# Supplementary material for: The Immunomodulatory Drug Glatiramer Acetate is Also an Effective Antimicrobial Agent that Kills Gram-negative Bacteria
Source: PubMed Central journal article supplement (PMC5688084; doi:10.1038/s41598-017-15969-3), 2017-11-15
Supplement: 41598_2017_15969_MOESM1_ESM.pdf [file 41598_2017_15969_MOESM1_ESM.pdf]

## **The Immunomodulatory Drug Glatiramer Acetate is Also an Effective Antimicrobial Agent that Kills Gram-negative Bacteria**

Stig Hill Christiansen<sup>1</sup>, Ronan A. Murphy<sup>2</sup>, Kristian Juul-Madsen<sup>1</sup>, Marlene Fredborg<sup>3</sup>, Michael Lykke Hvam<sup>4,5</sup>, Esben Axelgaard<sup>1</sup>, Sandra M. Skovdal<sup>4</sup>, Rikke Louise Meyer<sup>4,6</sup>, Uffe B. Skov Sørensen<sup>1</sup>, Arne Möller<sup>7</sup>, Jens Randel Nyengaard<sup>8,9</sup>, Niels Nørskov-Lauritsen<sup>3,10</sup>, Mikala Wang<sup>3,10</sup>, Mihaela Gadjeva<sup>11</sup>, Kenneth A. Howard<sup>4,5</sup>, Jane C. Davies<sup>2,12</sup>, Eskild Petersen<sup>10,13,14</sup>, Thomas Vorup-Jensen<sup>1,4,13</sup>

<sup>1</sup>Biophysical Immunology Laboratory, Dept. of Biomedicine, Aarhus University, Aarhus, Denmark; <sup>2</sup>CF and Chronic Lung Infection, National Heart and Lung Institute, Imperial College London, London, United Kingdom; <sup>3</sup>Dept. of Clinical Microbiology, Aarhus University Hospital Skejby, Denmark; <sup>4</sup>Interdisciplinary Nanoscience Center (iNANO), Aarhus University, Denmark; <sup>5</sup>Dept. of Molecular Biology & Genetics, Aarhus University, Aarhus, Denmark. <sup>6</sup>Dept. of Bioscience, Aarhus University, Aarhus, Denmark; <sup>7</sup>Dept. of Structural Biology, Max Planck Institute of Biophysics, Frankfurt, Germany; <sup>8</sup>Core Center for Molecular Morphology, Section for Stereology and Microscopy, Dept. of Clinical Medicine, Aarhus University, Aarhus, Denmark; <sup>9</sup>Center for Stochastic Geometry and Advanced Bioimaging, Aarhus University, Denmark; <sup>10</sup>Dept. of Clinical Medicine, Aarhus University, Aarhus, Denmark; <sup>11</sup>Dept. of Medicine, Division of Infectious Diseases, Brigham and Women's Hospital, Harvard Medical School, Boston, MA; <sup>12</sup>Dept. of Paediatric Respiratory Medicine, Royal Brompton & Harefield Foundation Trust, London, UK.; <sup>13</sup>Aarhus University Network for Interdisciplinary Drug Resistance Research. <sup>14</sup>Dept. of Infectious Diseases, The Royal Hospital, Muscat, Sultanate of Oman.

Corresponding author: Prof. Thomas Vorup-Jensen; Biophysical Immunology Laboratory, Dept. of Biomedicine, Aarhus University, DK-8000 Aarhus C, Denmark, phone (+45) 8716 7853; fax (+45) 8619 6128; e-mail: [vorup-jensen@biomed.au.dk](mailto:vorup-jensen@biomed.au.dk)

Supplementary Table 1: Clinical *P. aeruginosa* isolates data<sup>1</sup>

| STRAIN <sup>2</sup> | MUCOID | SAMPLE TYPE   | SENSITIVITY TESTING <sup>3</sup> |               |              |            |           | AGE<br>years | GENDER |
|---------------------|--------|---------------|----------------------------------|---------------|--------------|------------|-----------|--------------|--------|
|                     |        |               | Ceftazidime                      | Ciprofloxacin | Meropenem    | Tobramycin | Colistin  |              |        |
| FS1                 | Yes    | Spont. Sputum | Sensitive                        | Sensitive     | Sensitive    | Resistant  | Sensitive | 37           | Male   |
| FS2                 | No     | Spont. Sputum | Sensitive                        | Sensitive     | Sensitive    | Sensitive  | Sensitive | 45           | Male   |
| FS3                 | No     | Spont. Sputum | Resistant                        | Sensitive     | Resistant    | Resistant  | Sensitive | 25           | Male   |
| FS4                 | Yes    | Spont. Sputum | Sensitive                        | Resistant     | Sensitive    | Resistant  | Sensitive | 40           | Female |
| FS5                 | No     | Spont. Sputum | Sensitive                        | Sensitive     | Sensitive    | Sensitive  | Sensitive | 41           | Male   |
| FS6                 | Yes    | Spont. Sputum | Sensitive                        | Sensitive     | Sensitive    | Sensitive  | Sensitive | 14           | Male   |
| FS7                 | No     | Spont. Sputum | Resistant                        | Resistant     | Sensitive    | Resistant  | Resistant | 46           | Male   |
| FS8                 | Yes    | Spont. Sputum | Sensitive                        | Sensitive     | Sensitive    | Sensitive  | Sensitive | 30           | Male   |
| FS9                 | Yes    | Spont. Sputum | Resistant                        | Resistant     | Resistant    | Resistant  | Sensitive | 29           | Female |
| FS10                | Yes    | Spont. Sputum | Resistant                        | Sensitive     | Sensitive    | Resistant  | Sensitive | 36           | Female |
| FS11                | No     | Spont. Sputum | Resistant                        | Sensitive     | Resistant    | Sensitive  | Sensitive | 26           | Male   |
| FS12                | Yes    | Spont. Sputum | Sensitive                        | Resistant     | Sensitive    | Sensitive  | Sensitive | 38           | Male   |
| FS13                | Yes    | Spont. Sputum | Sensitive                        | Sensitive     | Sensitive    | Sensitive  | Sensitive | 47           | Male   |
| FS14                | No     | Spont. Sputum | Sensitive                        | Sensitive     | Sensitive    | Sensitive  | Sensitive | 38           | Male   |
| FS15                | No     | Spont. Sputum | Sensitive                        | Sensitive     | Sensitive    | Sensitive  | Sensitive | 42           | Male   |
| SS1                 | Yes    | Cough Swab    | Sensitive                        | Sensitive     | Sensitive    | Sensitive  | Sensitive | 19           | Female |
| SS2                 | Yes    | Spont. Sputum | Sensitive                        | Sensitive     | Sensitive    | Sensitive  | Sensitive | 24           | Female |
| SS3                 | No     | Spont. Sputum | Sensitive                        | Resistant     | Sensitive    | Resistant  | Sensitive | 5            | Male   |
| SS4                 | Yes    | Spont. Sputum | Resistant                        | Sensitive     | Resistant    | Sensitive  | Sensitive | 19           | Female |
| SS5                 | Yes    | Spont. Sputum | Sensitive                        | Sensitive     | Sensitive    | Sensitive  | Sensitive | 44           | Male   |
| SS6                 | Yes    | Spont. Sputum | N/T                              | N/T           | N/T          | N/T        | N/T       | 32           | Male   |
| SS7                 | No     | Spont. Sputum | Sensitive                        | Sensitive     | Sensitive    | Sensitive  | Sensitive | 21           | Female |
| R1                  | No     | Spont. Sputum | Sensitive                        | Sensitive     | Sensitive    | Sensitive  | Sensitive | 42           | Female |
| R2                  | Yes    | Spont. Sputum | Sensitive                        | Sensitive     | Sensitive    | Sensitive  | Sensitive | 28           | Female |
| R3                  | No     | Cough Swab    | Resistant                        | Resistant     | Resistant    | Resistant  | Sensitive | 13           | Female |
| R4                  | No     | Spont. Sputum | Resistant                        | Resistant     | Resistant    | Resistant  | Sensitive | 22           | Female |
| R5                  | No     | Spont. Sputum | Sensitive                        | Sensitive     | Resistant    | Sensitive  | Sensitive | 48           | Male   |
| R6                  | Yes    | Spont. Sputum | Sensitive                        | Sensitive     | Resistant    | Sensitive  | Sensitive | 43           | Male   |
| R7                  | Yes    | Spont. Sputum | Sensitive                        | Sensitive     | Sensitive    | Sensitive  | Sensitive | 48           | Male   |
| R8                  | Yes    | Spont. Sputum | Sensitive                        | Sensitive     | Sensitive    | Sensitive  | Sensitive | 56           | Male   |
| R9                  | Yes    | Spont. Sputum | Resistant                        | Resistant     | Resistant    | Resistant  | Sensitive | 30           | Male   |
| R10                 | No     | Spont. Sputum | Resistant                        | Resistant     | Resistant    | Resistant  | Sensitive | 29           | Female |
| R11                 | No     | Spont. Sputum | Resistant                        | Resistant     | Intermediate | Resistant  | Sensitive | 43           | Male   |
| R12                 | No     | Spont. Sputum | Sensitive                        | Sensitive     | Sensitive    | Sensitive  | Sensitive | 31           | Male   |
| R13                 | Yes    | Spont. Sputum | Resistant                        | Resistant     | Resistant    | Resistant  | Sensitive | 33           | Female |
| R14                 | No     | Spont. Sputum | Sensitive                        | Sensitive     | Sensitive    | Sensitive  | Sensitive | 16           | Female |
| R15                 | Yes    | Spont. Sputum | Sensitive                        | Sensitive     | Sensitive    | Sensitive  | Sensitive | 25           | Female |
| R16                 | Yes    | Spont. Sputum | Sensitive                        | Sensitive     | Sensitive    | Sensitive  | Sensitive | 24           | Male   |
| R17                 | No     | Spont. Sputum | Resistant                        | Resistant     | Resistant    | Sensitive  | Sensitive | 26           | Male   |
| R18                 | No     | Spont. Sputum | Sensitive                        | Sensitive     | Intermediate | Sensitive  | Sensitive | 73           | Male   |
| R19                 | Yes    | Spont. Sputum | Sensitive                        | Sensitive     | Sensitive    | Sensitive  | Sensitive | 15           | Male   |
| R20                 | Yes    | Spont. Sputum | Sensitive                        | Sensitive     | Sensitive    | Sensitive  | Sensitive | 31           | Female |
| R21                 | No     | Spont. Sputum | Sensitive                        | Resistant     | Sensitive    | Resistant  | Sensitive | 16           | Female |
| R22                 | No     | Spont. Sputum | Sensitive                        | Sensitive     | Resistant    | Sensitive  | Sensitive | 21           | Female |

<sup>1</sup>Data on clinical isolates of *P. aeruginosa* on mucoidy, sample collection, resistance to classic antibiotics, and age and gender of the patient. <sup>2</sup>Samples were divided into groups of fast susceptible (FS), slow susceptible (SS), and resistant (R) strains. <sup>3</sup>N/T; Not tested.

Fig. S1, Christiansen *et al.*

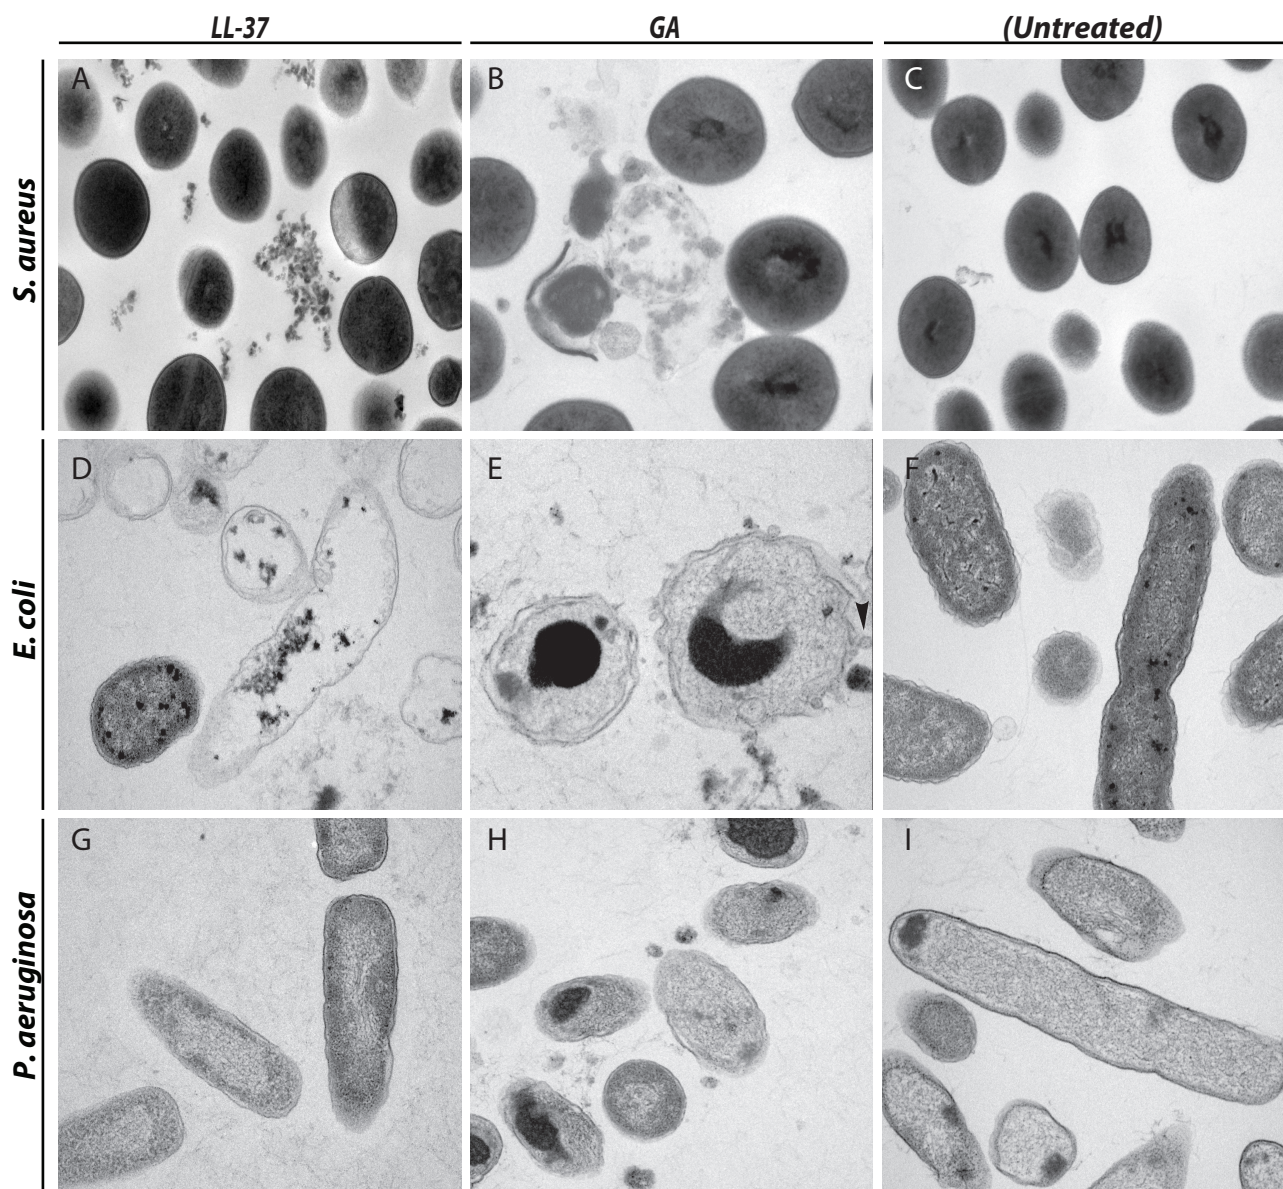

500 nm

### **Supplementary Figure 1**

TEM images of *S. aureus* (A-C), *E. coli* (D-F), and *P. aeruginosa* (G-I) exposed to LL-37 (A,D,G), GA (B,E,H), or left as untreated (C,F,I). Higher magnification micrographs of the samples shown in Fig. 8. Scale bar, 500 nm.
